# Supplementary material
Source: bioRxiv or medRxiv preprint supplement (https://medrxiv.org/highwire/filestream/81343/field_highwire_adjunct_files/0/2020.05.14.20102459-1.pdf)
Supplement: Supplementary file [file 2020.05.14.20102459-1.pdf]

# Supplementary Information for

## **Early transmission of COVID-19 has an optimal temperature but late transmission decreases in warm climate**

Xinru Wan, Chaoyuan Cheng and Zhibin Zhang

Corresponding author: Zhibin Zhang

Email: [zhangzb@ioz.ac.cn](mailto:zhangzb@ioz.ac.cn)

### **This PDF file includes:**

Correlation between the transmission severity and human/climate factors

Table S1 to S4

Figure S1 to S7

### **Correlation between the transmission severity and human/climate factors**

Using Pearson's correlation analysis on data from 1 January to 11 March in China, we found the average daily increase rate was negative correlated with temperature ( $r = -0.11, p < 0.05$ ), the maximum daily increase rate was positive correlated with founding population size during the initial 7 days after the first patient ( $r = 0.28, p < 0.001$ ), the control efficiency was positive correlated with founding population size during the initial 7 days after the first patient ( $r = 0.21, p < 0.001$ ), human population ( $r = 0.19, p < 0.001$ ), and precipitation ( $r = 0.24, p < 0.001$ ) (Fig. S2).

Using Pearson's correlation analysis on data from 20 January to 4 April in the USA, we found the maximum daily increase rate was positive correlated with founding population size during the initial 7 days after the first patient ( $r = 0.63, p < 0.001$ ), the control efficiency was positive correlated with human population ( $r = 0.41, p < 0.01$ ), and precipitation ( $r = 0.40, p < 0.01$ ) (Fig. S3).

Using Pearson's correlation analysis on data from 20 January to 4 April in Europe, we found the maximum daily increase rate was positive correlated with founding population size during the initial 7 days after the first patient ( $r = 0.49, p < 0.001$ ), the control efficiency was positive correlated with founding population size during the initial 7 days after the first patient ( $r = -0.33, p < 0.05$ ) (Fig. S4).

Using Pearson's correlation analysis on data from 1 January to 4 April for the world data, we found the average daily increase rate was positive correlated with precipitation ( $r = 0.11, p < 0.01$ ), maximum daily increase rate was positive correlated with founding population size during the initial 7 days after the first patient ( $r = 0.30, p < 0.001$ ), but

negative correlated with human population ( $r = -0.14, p < 0.01$ ), temperature ( $r = -0.22, p < 0.001$ ), and precipitation ( $r = -0.12, p < 0.01$ ), the control efficiency was positive correlated with founding population size during the initial 7 days after the first patient ( $r = 0.15, p < 0.001$ ), temperature ( $r = 0.10, p < 0.05$ ), and precipitation ( $r = 0.19, p < 0.001$ ) (Fig. S5).

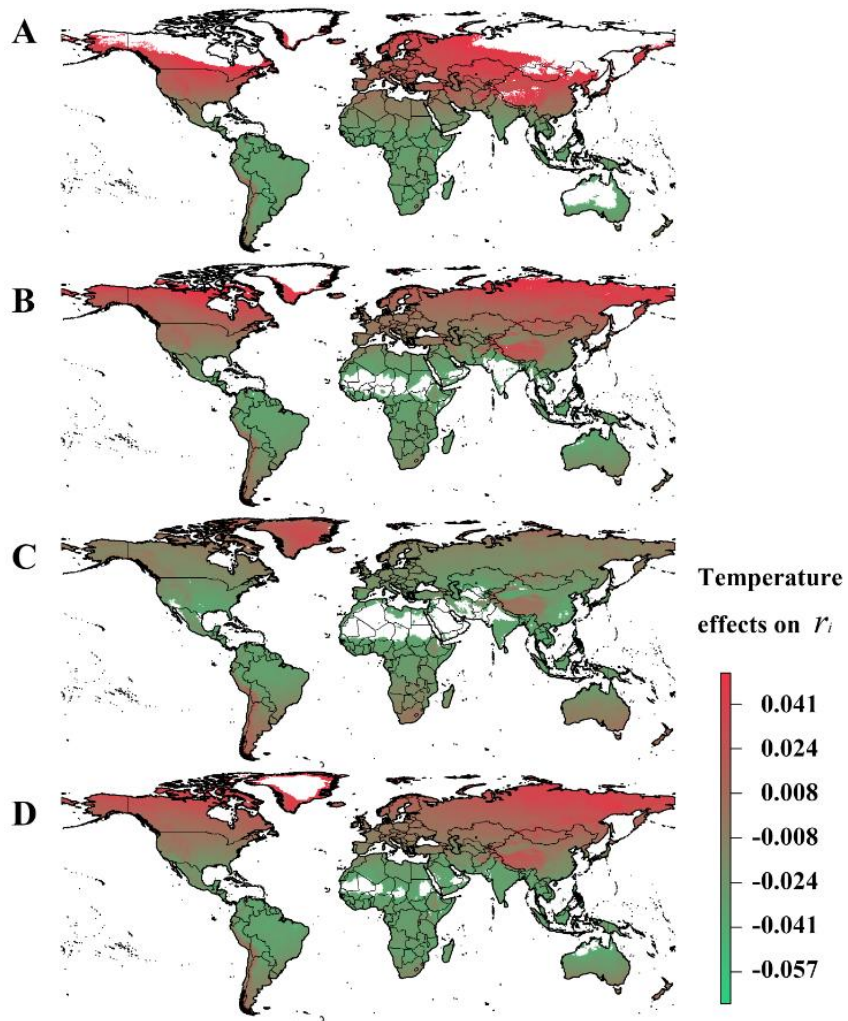

**Fig. S1. Seasonal projected partial effects of air temperature on the average daily increase rate ( $r_i$ ) under human intervention in January (A), April (B), July (C) and October (D). Colors (green to red: negative to positive) indicate the temperature effects on average daily increase rate ( $r_i$ ).**

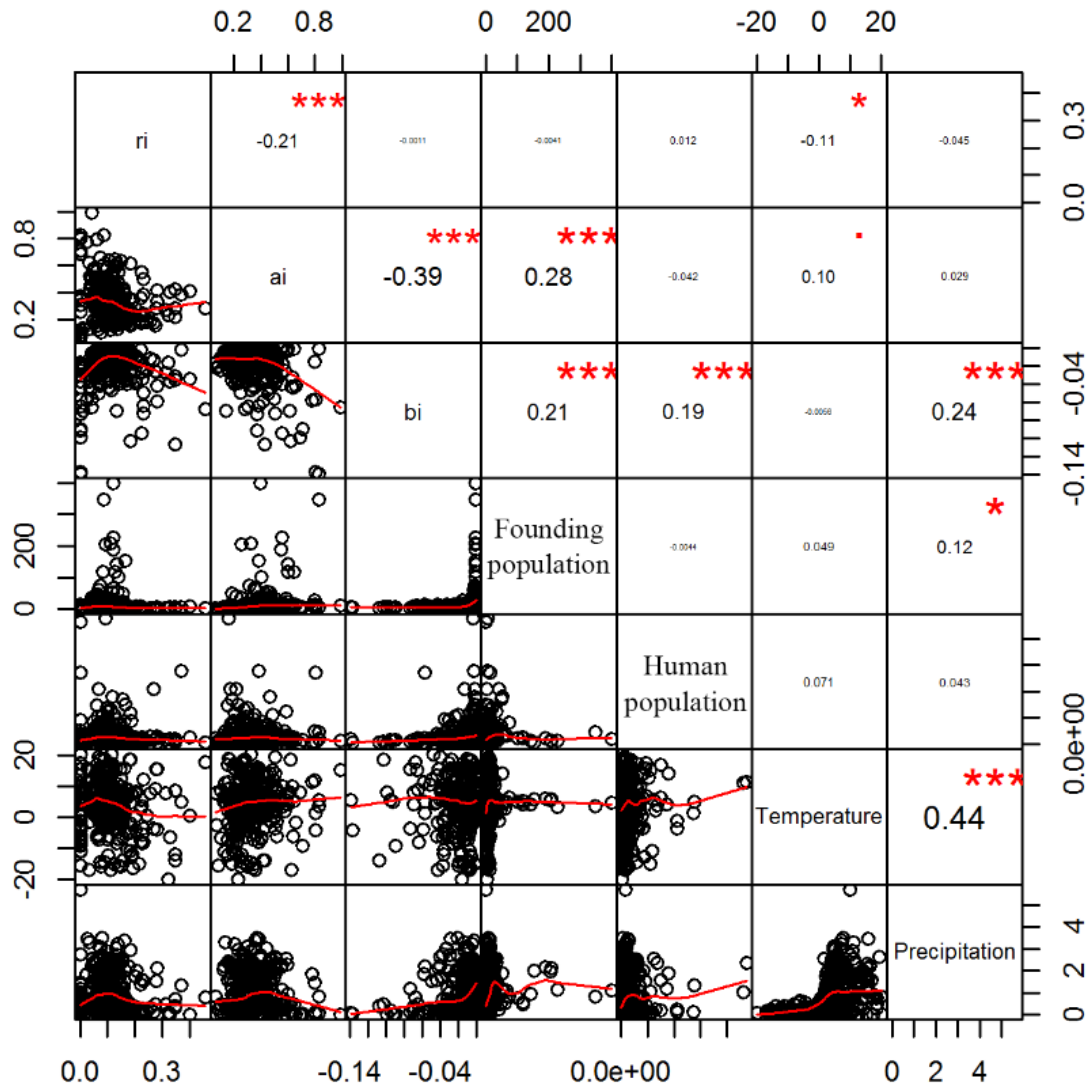

**Fig. S2. Correlation of the average daily increase rate ( $r_i$ ) of cumulative cases, maximum daily increase rate ( $a_i$ ), and control efficiency ( $b_i$ ) of COVID-19 with founding population size during the initial 7 days after the first patient, human population, and climate factors (temperature and precipitation) in China.**

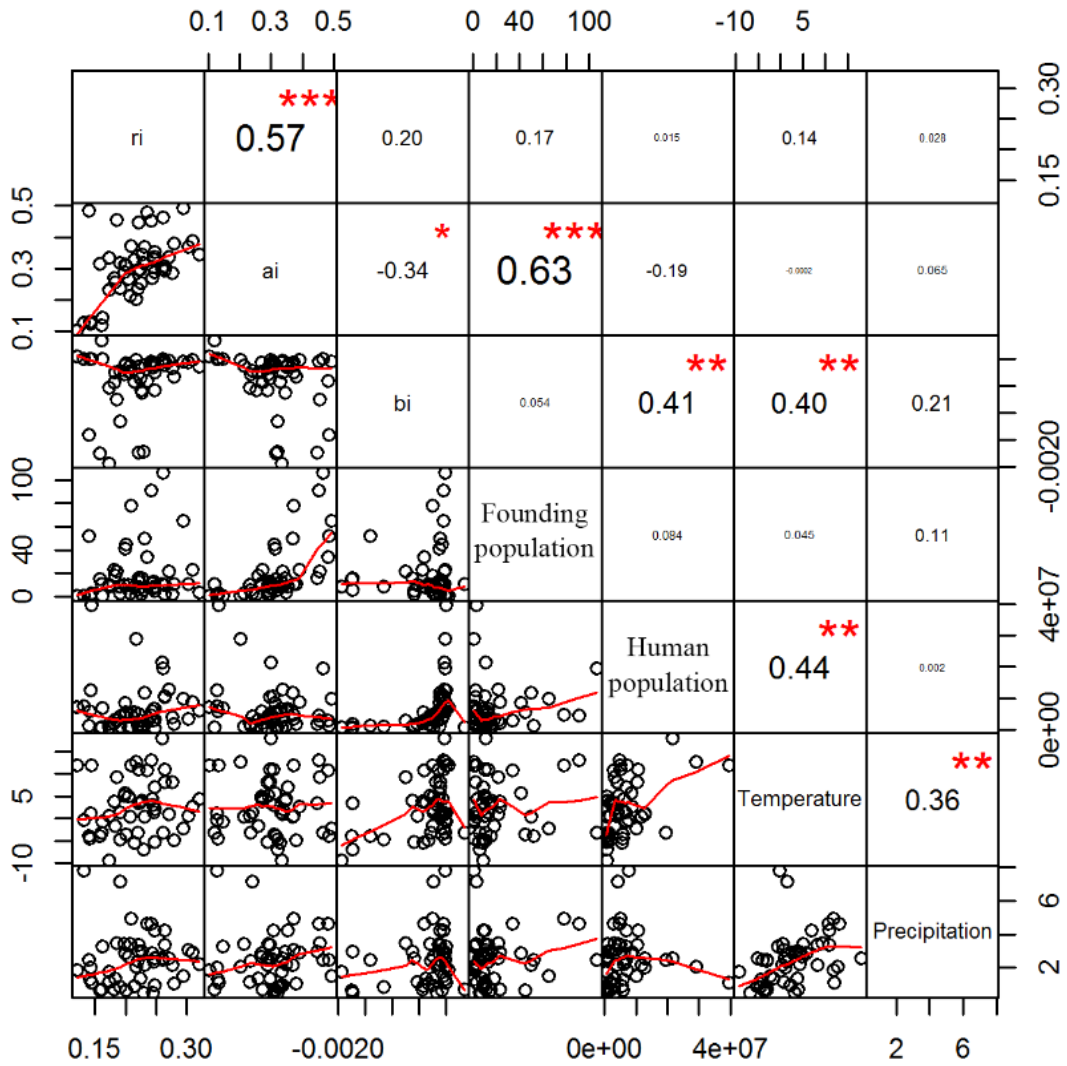

**Fig. S3. Correlation of the average daily increase rate ( $r_i$ ) of cumulative cases, maximum daily increase rate ( $a_i$ ), and control efficiency ( $b_i$ ) of COVID-19 with founding population size during the initial 7 days after the first patient, human population, and climate factors (temperature and precipitation) in the USA.**

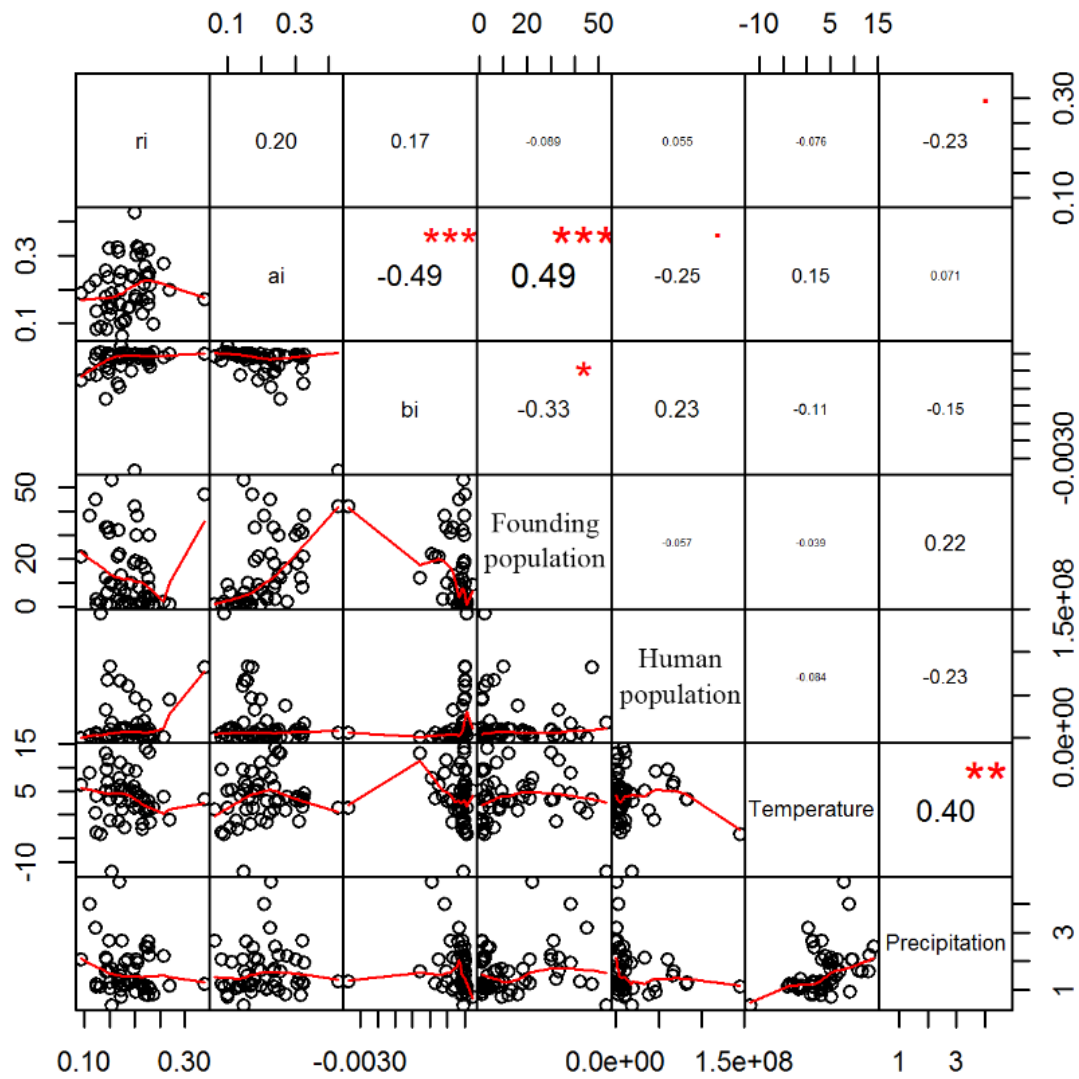

**Fig. S4.** Correlation the average daily increase rate ( $r_i$ ) of cumulative cases, maximum daily increase rate ( $a_i$ ), control efficiency ( $b_i$ ) of COVID-19 with founding population size during the initial 7 days after the first patient, human population, and climate factors (temperature and precipitation) in Europe.

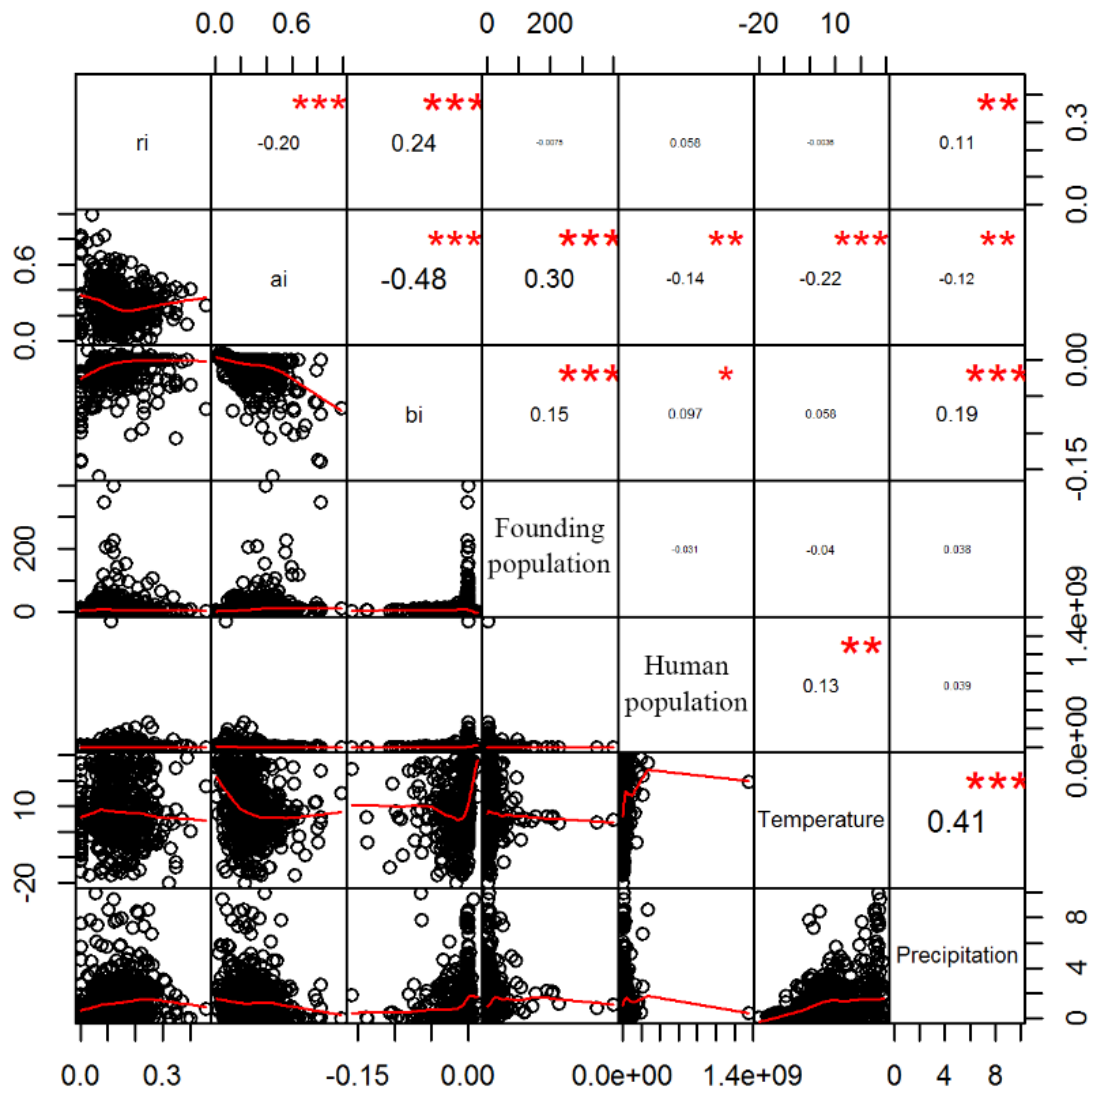

Fig. S5. Correlation of the average daily increase rate ( $r_i$ ) of cumulative cases, maximum daily increase rate ( $a_i$ ), control efficiency ( $b_i$ ) of COVID-19 with the founding population size during the initial 7 days after the first patient, human population, and climate factors (temperature and precipitation) in the world.



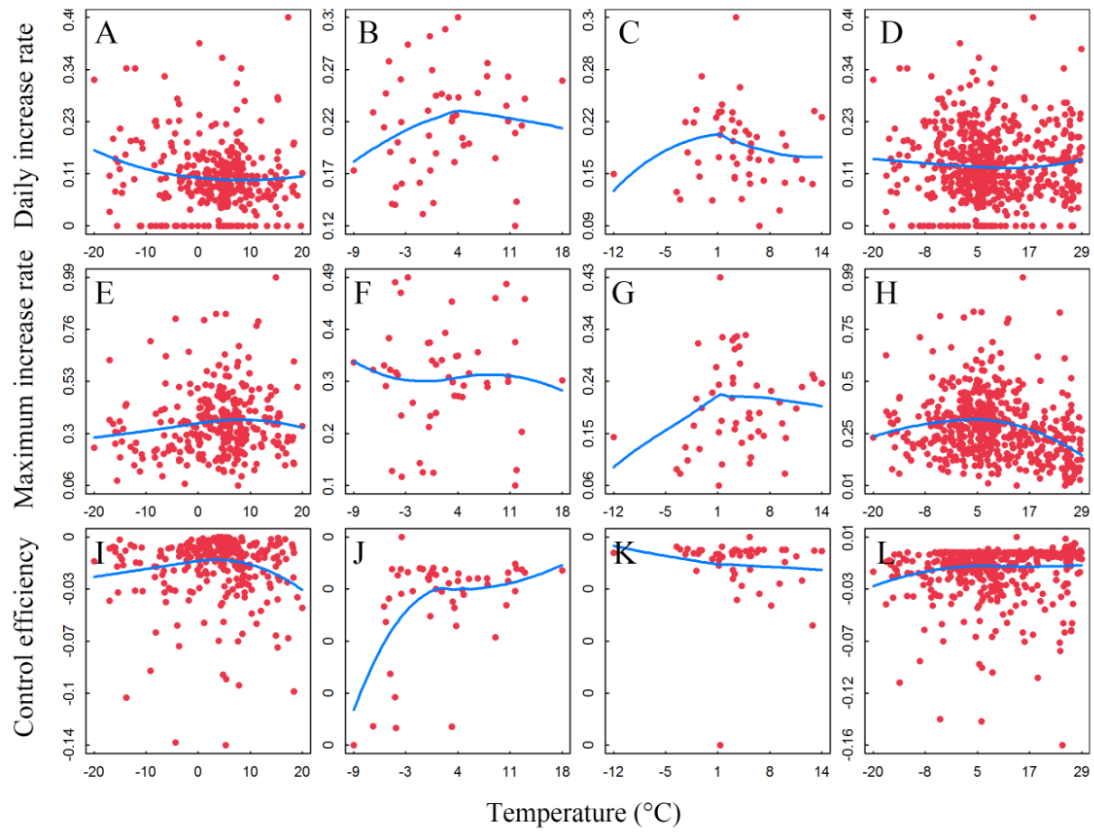

**Fig. S6.** Relationship of temperature with the average daily increase rate ( $r_i$ ), maximum daily increase rate ( $a_i$ ), control efficiency ( $b_i$ ) of COVID-19 in China (A, E, I), USA (B, F, J), Europe (C, G, K), and the world (D, H, L). The blue lines indicate the loess regression with span = 1.

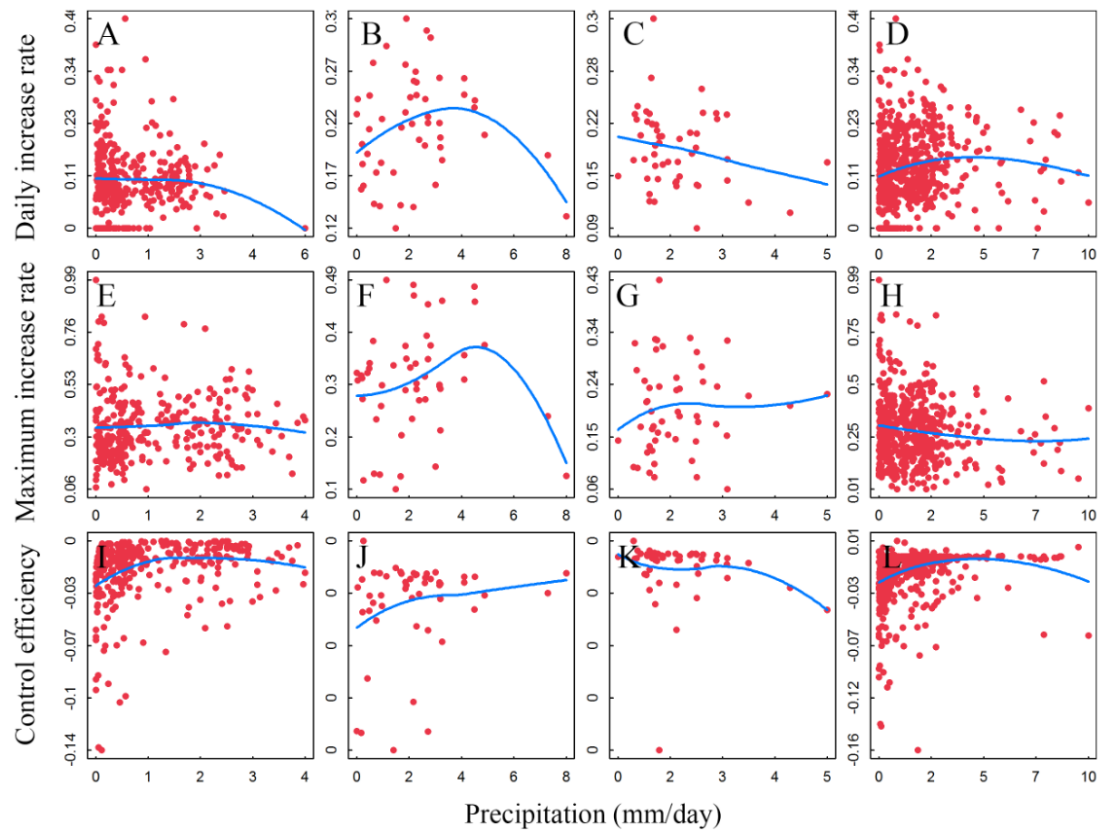

**Fig. S7.** Relationship of precipitation with the average daily increase rate ( $r_i$ ), maximum daily increase rate ( $a_i$ ), control efficiency ( $b_i$ ) of COVID-19 in China (A, E, I), USA (B, F, J), Europe (C, G, K), and the world (D, H, L). The blue lines indicate loess regression with span = 1.

**Table S1 Significant associations of average daily increase rate ( $r_i$ ) of cumulative cases, maximum daily increase rate ( $a_i$ ), control efficiency ( $b_i$ ) of COVID-19 with founding population size during the initial 7 days after the first patient ( $F_i$ ), human population, climate factors (temperature and precipitation), and spatial autocorrelation.** Bold values indicated the coefficients represent the significant effects ( $p < 0.05$ ). + denotes the significant effects of spatial autocorrelation or temperature ( $p < 0.05$ ), ns denotes non-significant effects. NA denotes not available (\*  $p < 0.05$ , \*\*  $p < 0.01$ , \*\*\*  $p < 0.001$ ). The significant association was extracted from Table S3. Models presented here were based on the observation that human or climate variables should have significant association with the average daily increase rate ( $r_i$ ), the maximum daily increase rate ( $a_i$ ) or the control efficiency ( $b_i$ ) in at least two repeated models from Table S3.

| Cumulative cases > | Region | Transmission parameters         | Founding population | Human population | Temperature | Precipitation | Spatial auto correlation | Variance explained | Sample size |
|--------------------|--------|---------------------------------|---------------------|------------------|-------------|---------------|--------------------------|--------------------|-------------|
| 0                  | China  | Increase rate ( $r_i$ )         | -1.80E-05           | 0.0025           | ***         | *             | ***                      | 8.48%              | 333         |
| 0                  | US     | Increase rate ( $r_i$ )         | 0.00015             | 0.0052           | NS          | NS            | NS                       | 17.02%             | 51          |
| 0                  | Europe | Increase rate ( $r_i$ )         | 0.00027             | 0.007 *          | **          | NS            | **                       | 37.02%             | 52          |
| 0                  | Global | Increase rate ( $r_i$ )         | -5.30E-06           | 0.0074 ***       | **          | NS            | ***                      | 23.61%             | 578         |
| 0                  | China  | Maximum increase rate ( $a_i$ ) | 0.001 ***           | -0.011           | NS          | NS            | NS                       | 10.98%             | 333         |
| 0                  | US     | Maximum increase rate ( $a_i$ ) | 0.0026 ***          | -0.022 .         | NS          | NS            | NS                       | 50.91%             | 51          |

|    |        |                                 |             |             |     |     |     |        |     |
|----|--------|---------------------------------|-------------|-------------|-----|-----|-----|--------|-----|
| 0  | Europe | Maximum increase rate ( $a_i$ ) | 0.0035 ***  | -0.00072    | *   | NS  | NS  | 41.31% | 52  |
| 10 | Global | Maximum increase rate ( $a_i$ ) | 0.0011 ***  | -0.0088 *   | **  | NS  | *** | 27.89% | 578 |
| 0  | China  | Control efficiency ( $b_i$ )    | 4.6e-05 **  | 0.0037 ***  | *** | *   | *   | 24.39% | 252 |
| 0  | US     | Control efficiency ( $b_i$ )    | -2.70E-06   | 0.00028 *** | NS  | NS  | NS  | 52.14% | 51  |
| 0  | Europe | Control efficiency ( $b_i$ )    | -8.7e-06 .  | 0.00011 **  | NS  | NS  | **  | 54.11% | 52  |
| 0  | Global | Control efficiency ( $b_i$ )    | 8.6e-05 *** | 0.0036 ***  | NS  | *** | *** | 24.20% | 578 |

**Table S2 Associations of average daily increase rate ( $r_i$ ) of cumulative cases, maximum daily increase rate ( $a_i$ ), control efficiency ( $b_i$ ), of COVID-19 with founding population size during the initial 7 days after the first patient ( $F_i$ ), human population, climate factors (temperature and precipitation), and spatial autocorrelation based on analyses using Equation 2 (linear model) for locations with more than 0/10/20/30 cases. Bold values indicated the coefficients represent the significant effects ( $p < 0.05$ ). + denotes the significant effects of spatial autocorrelation or temperature ( $p < 0.05$ ), ns denotes non-significant effects. NA denotes not available (\*  $p < 0.05$ , \*\*  $p < 0.01$ , \*\*\*  $p < 0.001$ ).**

| Cumulative cases > | Region | Transmission parameters | Founding population | Human population | Temperature | Precipitation | Spatial auto correlation | Variance explained | Sample size |
|--------------------|--------|-------------------------|---------------------|------------------|-------------|---------------|--------------------------|--------------------|-------------|
| 0                  | China  | ri                      | -1.80E-05           | 0.0025           | -0.0074 *** | -0.013 *      | ***                      | 8.48%              | 333         |
| 10                 | China  | ri                      | -4.70E-05           | -0.0014          | -0.0035 *   | -0.0051       | NS                       | 6.45%              | 252         |
| 20                 | China  | ri                      | -1.10E-05           | 0.0048           | -0.0036 *   | -0.0018       | NS                       | 7.53%              | 177         |
| 30                 | China  | ri                      | -2.20E-06           | 0.0076           | -0.0034 .   | 0.00041       | NS                       | 8.78%              | 134         |
| 0                  | USA    | ri                      | 0.00018             | 0.0045           | 0.00029     | -0.0021       | NS                       | 14.76%             | 51          |
| 10                 | USA    | ri                      | 0.00018             | 0.0045           | 0.00029     | -0.0021       | NS                       | 14.76%             | 51          |
| 20                 | USA    | ri                      | 0.00018             | 0.0045           | 0.00029     | -0.0021       | NS                       | 14.76%             | 51          |
| 30                 | USA    | ri                      | 0.00018             | 0.0045           | 0.00029     | -0.0021       | NS                       | 14.76%             | 51          |
| 0                  | Europe | ri                      | -0.00012            | 0.0062 .         | -0.0066 *   | -0.0091       | *                        | 23.15%             | 52          |
| 10                 | Europe | ri                      | -0.00012            | 0.0062 .         | -0.0066 *   | -0.0091       | *                        | 23.15%             | 52          |
| 20                 | Europe | ri                      | -0.00012            | 0.0062 .         | -0.0066 *   | -0.0091       | *                        | 23.15%             | 52          |
| 30                 | Europe | ri                      | -0.00012            | 0.0062 .         | -0.0066 *   | -0.0091       | *                        | 23.15%             | 52          |
| 0                  | Global | ri                      | -5.30E-06           | 0.0074 ***       | -0.0015 **  | 0.0026        | ***                      | 23.61%             | 578         |
| 10                 | Global | ri                      | -7.20E-05           | 0.0053 **        | -0.0016 *** | 0.0022        | ***                      | 34.28%             | 467         |

|    |        |    |             |             |             |            |     |        |     |
|----|--------|----|-------------|-------------|-------------|------------|-----|--------|-----|
| 20 | Global | ri | -5.10E-05   | 0.0048 **   | -0.0011 *   | 0.0024     | *** | 43.62% | 376 |
| 30 | Global | ri | -6.60E-05   | 0.0049 **   | -0.0013 **  | 0.0025     | *** | 42.16% | 328 |
| 0  | China  | ai | 0.00099 *** | -0.012      | 0.0032      | -0.019     | NS  | 10%    | 333 |
| 10 | China  | ai | 0.00092 *** | -0.008      | 0.0055      | -0.0073    | NS  | 11.17% | 252 |
| 20 | China  | ai | 0.00081 *** | -0.006      | -0.0046     | -0.018     | NS  | 19.86% | 177 |
| 30 | China  | ai | 0.00081 *** | -0.0098     | -0.011 .    | -0.019     | NS  | 21.55% | 134 |
| 0  | USA    | ai | 0.0028 ***  | -0.025 .    | 0.0038      | -0.0023    | NS  | 45.53% | 51  |
| 10 | USA    | ai | 0.0028 ***  | -0.025 .    | 0.0038      | -0.0023    | NS  | 45.53% | 51  |
| 20 | USA    | ai | 0.0028 ***  | -0.025 .    | 0.0038      | -0.0023    | NS  | 45.53% | 51  |
| 30 | USA    | ai | 0.0028 ***  | -0.025 .    | 0.0038      | -0.0023    | NS  | 45.53% | 51  |
| 0  | Europe | ai | 0.0032 ***  | -0.0014     | 0.0064      | -0.019     | NS  | 32.94% | 52  |
| 10 | Europe | ai | 0.0032 ***  | -0.0014     | 0.0064      | -0.019     | NS  | 32.94% | 52  |
| 20 | Europe | ai | 0.0032 ***  | -0.0014     | 0.0064      | -0.019     | NS  | 32.94% | 52  |
| 30 | Europe | ai | 0.0032 ***  | -0.0014     | 0.0064      | -0.019     | NS  | 32.94% | 52  |
| 0  | Global | ai | 0.0012 ***  | -0.0077 *   | -0.00017    | -0.00075   | *** | 26.04% | 578 |
| 10 | Global | ai | 0.0012 ***  | -0.0088 *   | -0.00047    | -0.0012    | *** | 29.54% | 467 |
| 20 | Global | ai | 0.0011 ***  | -0.0059 .   | -0.0022 *   | 0.00034    | *** | 38.93% | 376 |
| 30 | Global | ai | 0.0011 ***  | -0.0086 *   | -0.0025 *   | 0.00085    | *** | 40.65% | 328 |
| 0  | China  | bi | 8.5e-05 **  | 0.0094 ***  | -0.00063    | 0.0063 *** | NS  | 24.79% | 333 |
| 10 | China  | bi | 5.2e-05 *** | 0.0038 ***  | -0.0013 *** | 0.0016     | **  | 22.25% | 252 |
| 20 | China  | bi | 3.7e-05 *** | 0.0018 ***  | -0.00041 *  | 0.0016 *   | NS  | 24.20% | 177 |
| 30 | China  | bi | 2.6e-05 *** | 0.0012 **   | 0.00024     | 0.0014 *   | NS  | 25.15% | 134 |
| 0  | USA    | bi | -3.50E-06   | 0.00029 *** | -4.60E-05   | 6.20E-05   | *   | 49.06% | 51  |
| 10 | USA    | bi | -3.50E-06   | 0.00029 *** | -4.60E-05   | 6.20E-05   | *   | 49.06% | 51  |
| 20 | USA    | bi | -3.50E-06   | 0.00029 *** | -4.60E-05   | 6.20E-05   | *   | 49.06% | 51  |
| 30 | USA    | bi | -3.50E-06   | 0.00029 *** | -4.60E-05   | 6.20E-05   | *   | 49.06% | 51  |

|    |        |    |             |             |            |             |     |        |     |
|----|--------|----|-------------|-------------|------------|-------------|-----|--------|-----|
| 0  | Europe | bi | -9.6e-06 *  | 9.8e-05 *   | -5.5e-05 * | -4.80E-06   | **  | 37.74% | 52  |
| 10 | Europe | bi | -9.6e-06 *  | 9.8e-05 *   | -5.5e-05 * | -4.80E-06   | **  | 37.74% | 52  |
| 20 | Europe | bi | -9.6e-06 *  | 9.8e-05 *   | -5.5e-05 * | -4.80E-06   | **  | 37.74% | 52  |
| 30 | Europe | bi | -9.6e-06 *  | 9.8e-05 *   | -5.5e-05 * | -4.80E-06   | **  | 37.74% | 52  |
| 0  | Global | bi | 9.7e-05 *** | 0.0037 ***  | -6.50E-05  | 0.0021 ***  | *** | 21.94% | 578 |
| 10 | Global | bi | 5.3e-05 *** | 0.0015 ***  | -4.70E-05  | 0.00096 **  | *** | 30.80% | 467 |
| 20 | Global | bi | 2.8e-05 *** | 0.00056 *** | 2.80E-05   | 0.00051 *** | *** | 44.89% | 376 |
| 30 | Global | bi | 1.9e-05 *** | 0.00048 *** | 3.80E-05   | 0.00028 **  | *** | 48.38% | 328 |

**Table S3 Associations of average daily increase rate ( $r_i$ ) of cumulative cases, maximum daily increase rate ( $a_i$ ), control efficiency ( $b_i$ ) of COVID-19 with founding population size during the initial 7 days after the first patient ( $F_i$ ), human population, climate factors (temperature and precipitation), and spatial autocorrelation based on analyses using Equation 3 (non-linear model) for locations with more than 0/10/20/30 cases. Bold values indicated the coefficients represent the significant effects ( $p < 0.05$ ). + denotes the significant effects of spatial autocorrelation or temperature ( $p < 0.05$ ), ns denotes non-significant effects. NA denotes not available (\*  $p < 0.05$ , \*\*  $p < 0.01$ , \*\*\*  $p < 0.001$ ).**

| Cumulative cases > | Region | Transmission parameters | Founding population | Human population | Temperature | Precipitation | Spatial auto correlation | Variance explained | Sample size |
|--------------------|--------|-------------------------|---------------------|------------------|-------------|---------------|--------------------------|--------------------|-------------|
| 0                  | China  | ri                      | -1.80E-05           | 0.0025           | ***         | *             | ***                      | 8.48%              | 333         |
| 10                 | China  | ri                      | -4.70E-05           | -0.0014          | *           | NS            | NS                       | 6.45%              | 252         |
| 20                 | China  | ri                      | -1.10E-05           | 0.0048           | *           | NS            | NS                       | 7.53%              | 177         |
| 30                 | China  | ri                      | -2.20E-06           | 0.0076           | NS          | NS            | NS                       | 8.78%              | 134         |
| 0                  | USA    | ri                      | 0.00015             | 0.0052           | NS          | NS            | NS                       | 17.02%             | 51          |
| 10                 | USA    | ri                      | 0.00015             | 0.0052           | NS          | NS            | NS                       | 17.02%             | 51          |
| 20                 | USA    | ri                      | 0.00015             | 0.0052           | NS          | NS            | NS                       | 17.02%             | 51          |
| 30                 | USA    | ri                      | 0.00015             | 0.0052           | NS          | NS            | NS                       | 17.02%             | 51          |
| 0                  | Europe | ri                      | 0.00027             | 0.007 *          | **          | NS            | **                       | 37.02%             | 52          |
| 10                 | Europe | ri                      | 0.00027             | 0.007 *          | **          | NS            | **                       | 37.02%             | 52          |
| 20                 | Europe | ri                      | 0.00027             | 0.007 *          | **          | NS            | **                       | 37.02%             | 52          |
| 30                 | Europe | ri                      | 0.00027             | 0.007 *          | **          | NS            | **                       | 37.02%             | 52          |
| 0                  | Global | ri                      | -5.30E-06           | 0.0074 ***       | **          | NS            | ***                      | 23.61%             | 578         |
| 10                 | Global | ri                      | -7.20E-05           | 0.0053 **        | ***         | NS            | ***                      | 34.28%             | 467         |



|    |        |    |             |             |     |     |     |        |     |
|----|--------|----|-------------|-------------|-----|-----|-----|--------|-----|
| 20 | Global | ri | -5.10E-05   | 0.0049 **   | *   | NS  | *** | 44.36% | 376 |
| 30 | Global | ri | -6.20E-05   | 0.0049 **   | *   | NS  | *** | 42.36% | 328 |
| 0  | China  | ai | 0.001 ***   | -0.011      | NS  | NS  | NS  | 10.98% | 333 |
| 10 | China  | ai | 0.00092 *** | -0.008      | NS  | NS  | NS  | 11.17% | 252 |
| 20 | China  | ai | 0.00081 *** | -0.0059     | NS  | NS  | NS  | 19.88% | 177 |
| 30 | China  | ai | 0.00081 *** | -0.0098     | NS  | NS  | NS  | 21.55% | 134 |
| 0  | USA    | ai | 0.0026 ***  | -0.022 .    | NS  | NS  | NS  | 50.91% | 51  |
| 10 | USA    | ai | 0.0026 ***  | -0.022 .    | NS  | NS  | NS  | 50.91% | 51  |
| 20 | USA    | ai | 0.0026 ***  | -0.022 .    | NS  | NS  | NS  | 50.91% | 51  |
| 30 | USA    | ai | 0.0026 ***  | -0.022 .    | NS  | NS  | NS  | 50.91% | 51  |
| 0  | Europe | ai | 0.0035 ***  | -0.00072    | *   | NS  | NS  | 41.31% | 52  |
| 10 | Europe | ai | 0.0035 ***  | -0.00072    | *   | NS  | NS  | 41.31% | 52  |
| 20 | Europe | ai | 0.0035 ***  | -0.00072    | *   | NS  | NS  | 41.31% | 52  |
| 30 | Europe | ai | 0.0035 ***  | -0.00072    | *   | NS  | NS  | 41.31% | 52  |
| 0  | Global | ai | 0.0011 ***  | -0.0088 *   | **  | NS  | *** | 27.89% | 578 |
| 10 | Global | ai | 0.0011 ***  | -0.0094 **  | **  | NS  | *** | 31.83% | 467 |
| 20 | Global | ai | 0.0011 ***  | -0.0061 .   | *** | NS  | *** | 41.53% | 376 |
| 30 | Global | ai | 0.0011 ***  | -0.0087 *   | **  | NS  | *** | 41.92% | 328 |
| 0  | China  | bi | 6.7e-05 *   | 0.0088 ***  | NS  | *** | NS  | 27.87% | 333 |
| 10 | China  | bi | 4.6e-05 **  | 0.0037 ***  | *** | *   | *   | 24.39% | 252 |
| 20 | China  | bi | 3.7e-05 *** | 0.0018 ***  | *   | *   | NS  | 24.20% | 177 |
| 30 | China  | bi | 2.5e-05 *** | 0.0012 **   | NS  | *   | NS  | 27.83% | 134 |
| 0  | USA    | bi | -2.70E-06   | 0.00028 *** | NS  | NS  | NS  | 52.14% | 51  |
| 10 | USA    | bi | -2.70E-06   | 0.00028 *** | NS  | NS  | NS  | 52.14% | 51  |
| 20 | USA    | bi | -2.70E-06   | 0.00028 *** | NS  | NS  | NS  | 52.14% | 51  |
| 30 | USA    | bi | -2.70E-06   | 0.00028 *** | NS  | NS  | NS  | 52.14% | 51  |

|    |        |    |             |             |    |     |     |        |     |
|----|--------|----|-------------|-------------|----|-----|-----|--------|-----|
| 0  | Europe | bi | -8.7e-06 .  | 0.00011 **  | NS | NS  | **  | 54.11% | 52  |
| 10 | Europe | bi | -8.7e-06 .  | 0.00011 **  | NS | NS  | **  | 54.11% | 52  |
| 20 | Europe | bi | -8.7e-06 .  | 0.00011 **  | NS | NS  | **  | 54.11% | 52  |
| 30 | Europe | bi | -8.7e-06 .  | 0.00011 **  | NS | NS  | **  | 54.11% | 52  |
| 0  | Global | bi | 8.6e-05 *** | 0.0036 ***  | NS | *** | *** | 24.20% | 578 |
| 10 | Global | bi | 4.9e-05 *** | 0.0015 ***  | NS | *** | *** | 33.26% | 467 |
| 20 | Global | bi | 2.8e-05 *** | 0.00059 *** | ** | *** | *** | 48.57% | 376 |
| 30 | Global | bi | 1.9e-05 *** | 0.00048 *** | NS | *   | *** | 48.65% | 328 |

**Table S4 Associations of the number of cumulative cases (N) of COVID-19 with founding population size during the initial 7 days after the first patient ( $F_i$ ), human population, climate factors (temperature and precipitation), and spatial autocorrelation based on analyses using Equation 2 (linear model) and 3 (non-linear model) for locations with more than 0/10/20/30 cases. Bold values indicated the coefficients represent the significant effects ( $p < 0.05$ ). + denotes the significant effects of spatial autocorrelation or temperature ( $p < 0.05$ ), ns denotes non-significant effects. NA denotes not available (\*  $p < 0.05$ , \*\*  $p < 0.01$ , \*\*\*  $p < 0.001$ ).**

| Equation   | Cumulative cases > | Region | Founding population | Human population | Temperature | Precipitation | Spatial auto correlation | Variance explained | Sample size |
|------------|--------------------|--------|---------------------|------------------|-------------|---------------|--------------------------|--------------------|-------------|
| 2 (linear) | 0                  | China  | 9.6 *               | 420 *            | -43         | 21            | NS                       | 3.76%              | 333         |
| 2 (linear) | 10                 | China  | 9.9 *               | 650 *            | -97         | 2.1           | NS                       | 4.51%              | 252         |
| 2 (linear) | 20                 | China  | 10 .                | 970 *            | -170        | -18           | NS                       | 5.67%              | 177         |
| 2 (linear) | 30                 | China  | 11                  | 1300 *           | -280        | -69           | NS                       | 6.51%              | 134         |
| 2 (linear) | 0                  | US     | 350 ***             | 7400 ***         | -130        | -570          | NS                       | 48.72%             | 51          |
| 2 (linear) | 10                 | US     | 350 ***             | 7400 ***         | -130        | -570          | NS                       | 48.72%             | 51          |
| 2 (linear) | 20                 | US     | 350 ***             | 7400 ***         | -130        | -570          | NS                       | 48.72%             | 51          |
| 2 (linear) | 30                 | US     | 350 ***             | 7400 ***         | -130        | -570          | NS                       | 48.72%             | 51          |

|                |    |        |         |          |      |     |     |        |     |
|----------------|----|--------|---------|----------|------|-----|-----|--------|-----|
| 2 (linear)     | 0  | Europe | -400 .  | 8100 *** | -190 | 620 | *   | 47.28% | 52  |
| 2 (linear)     | 10 | Europe | -400 .  | 8100 *** | -190 | 620 | *   | 47.28% | 52  |
| 2 (linear)     | 20 | Europe | -400 .  | 8100 *** | -190 | 620 | *   | 47.28% | 52  |
| 2 (linear)     | 30 | Europe | -400 .  | 8100 *** | -190 | 620 | *   | 47.28% | 52  |
| 2 (linear)     | 0  | Global | 29 *    | 1700 *** | 16   | 440 | *** | 14.08% | 578 |
| 2 (linear)     | 10 | Global | 33 *    | 2100 *** | 2.3  | 440 | *** | 14.87% | 467 |
| 2 (linear)     | 20 | Global | 35 *    | 2300 *** | -13  | 390 | **  | 15.39% | 376 |
| 2 (linear)     | 30 | Global | 38 *    | 2600 *** | -62  | 520 | **  | 15.52% | 328 |
| 3 (non-linear) | 0  | China  | 9.6 *   | 420 *    | NS   | NS  | NS  | 3.76%  | 333 |
| 3 (non-linear) | 10 | China  | 9.9 *   | 650 *    | NS   | NS  | NS  | 4.51%  | 252 |
| 3 (non-linear) | 20 | China  | 9.8 .   | 970 *    | NS   | NS  | NS  | 5.85%  | 177 |
| 3 (non-linear) | 30 | China  | 9.1     | 1300 *   | NS   | NS  | NS  | 7.83%  | 134 |
| 3 (non-linear) | 0  | US     | 350 *** | 7400 *** | NS   | NS  | NS  | 48.72% | 51  |
| 3 (non-linear) | 10 | US     | 350 *** | 7400 *** | NS   | NS  | NS  | 48.72% | 51  |

|                |    |        |         |          |    |    |     |        |     |
|----------------|----|--------|---------|----------|----|----|-----|--------|-----|
| 3 (non-linear) | 20 | US     | 350 *** | 7400 *** | NS | NS | NS  | 48.72% | 51  |
| 3 (non-linear) | 30 | US     | 350 *** | 7400 *** | NS | NS | NS  | 48.72% | 51  |
| 3 (non-linear) | 0  | Europe | -400 .  | 8100 *** | NS | NS | *   | 47.28% | 52  |
| 3 (non-linear) | 10 | Europe | -400 .  | 8100 *** | NS | NS | *   | 47.28% | 52  |
| 3 (non-linear) | 20 | Europe | -400 .  | 8100 *** | NS | NS | *   | 47.28% | 52  |
| 3 (non-linear) | 30 | Europe | -400 .  | 8100 *** | NS | NS | *   | 47.28% | 52  |
| 3 (non-linear) | 0  | Global | 29 *    | 1600 *** | NS | NS | *** | 14.29% | 578 |
| 3 (non-linear) | 10 | Global | 31 *    | 2000 *** | NS | NS | *** | 15.20% | 467 |
| 3 (non-linear) | 20 | Global | 34 *    | 2300 *** | NS | NS | **  | 15.82% | 376 |
| 3 (non-linear) | 30 | Global | 37 *    | 2600 *** | NS | NS | **  | 15.87% | 328 |
